# Supplementary material for: Olmsted Syndrome Caused by a Heterozygous p.Gly568Val Missense Mutation in TRPV3 Gene
Source: PubMed Central journal article supplement — Yonsei Med J. 2018 Feb 5;59(2):341–4. doi: 10.3349/ymj.2018.59.2.341 (PMC5823840; doi:10.3349/ymj.2018.59.2.341), 2018-02-05
Supplement: ymj-59-341-s001.pdf [file ymj-59-341-s001.pdf]

Supplementary Table 1. Coding exons (red) sense and antisense primers (blue) for mutation screening of *TRPV3* gene

| Exon number | Sense primer                | Antisense primer         | Sequence                                                                                                                                                                                                                                                                                                                                                                                                                                                                                                                                                                                                   |
|-------------|-----------------------------|--------------------------|------------------------------------------------------------------------------------------------------------------------------------------------------------------------------------------------------------------------------------------------------------------------------------------------------------------------------------------------------------------------------------------------------------------------------------------------------------------------------------------------------------------------------------------------------------------------------------------------------------|
| 2           | AGGAGTGAGCT<br>TCCAGTTCC    | GACTACCCCA<br>GCTCAGCC   | AGGAGTGAGCTTCCAGTTCCAGGTAGTGTGAACGGGAGCTGG<br>ATGCAGCCACATGGGGCCCCATAAATCCCTGAAGCTCCCCCTGTCC<br>CCCCGGCCTGAGCATCTGYCCTGTGGTTGTATTCCAGCCAWGAAA<br>GCCCCACCCAAAGGAGATGGTGCCTCTCATGGGCAAGRGAGTTRCT<br>GCCCCAGTGGGAACCCTGCYRTCCTGCCAGAGAAGAGKCYRGSR<br>GAGATCACCCCCACAAAGAAGAGGTGGGTTTGRAGAGCTYGGGA<br>CAYRGACTGYGCACTGTGAGGGGCAYRAGTGGGGGCCTGGvCAC<br>CCCCCAGGGAGCCCTTGCCTTGGGGAGACCTGAGACTCTCAGTC<br>TCGCCCCGGGTGGCCCGGTGCCYGGCGAGGTATGACTRGGGGATG<br>GTGCGGTGGGAGCACAGCACACTCAGGGGGCTGAGCTGGGGTA<br>GTC                                                                                                     |
| 3           | GGTGATAATGAC<br>AGTGTCCATCT | GCAACAGAGC<br>GACATTCCAT | GGTGATAATGACAGTGTCCATCTCYGAGGGCTCCCRGGAGGGCTG<br>GGCAAGGCCATTTGGGCTCAGAGCTGGCCAGGGTGTGTGCTCAGC<br>ATGGGGGCACCCTCTGGGGCCAGGAGGCAGGACACAGGCAGACA<br>GGCTCTGCCTGGCTYRGCCCTAACAGGCTTCCCTCGTRTTCCCTCA<br>GTGCACACTTCTTCTGGAGATAGAAGGGTTTGAACCCAAACCCCA<br>CAGTTGCCAAGACCTCTCCYCTGTCTTCTCCAAGCCCATGGATTC<br>CAACATCYRGYAGTGGTGAGTAYGGGYCCAGCCCAACCCCYTGC<br>CCTGGGCCAGCCCTCAGCTCCAGCATGTGGCCAGTGACTTGCCTT<br>GGGTCACGGGGSCAGGCCTGGCTGTGGCATGCTACCAGTGTCTATT<br>ATAAAACDTTATTATTATTATTATCTTTTTGAGATGGAATGTCGCTC<br>TGTTG                                                                                          |
| 4           | CGAACTCCTGAC<br>CTCAAGTG    | TACTCCACTCC<br>TTCCCCGTA | CGAACTCCTGACCTCAAGTGATCCACCTGCCTYRGCCTCCCAAAG<br>TGCTGGGATTACATGCATGASCCACCTACCCGGCCATTTTAWA<br>CTTTAAAACCCCTCTCTGTTCCSCTGCCAACACCTCCAGYATCTCT<br>GGTAACTGTGATGACRTGGACTCCCCSAGTCTCCTCARGATGATG<br>TGACAGAGAYCCCATCCARTCCCAACAGCCCCAGGTAAGTCTGCY<br>CCTCCCCCTCYACCCACTGTGCCACYCAGGCTGGGGGTGCCAGA<br>GAGACAGGATCCRGGGCCCTGCAGGAAGGAGAAAGAATCCACCA<br>TTCTGGGGWTTGGGACAAGTGGAGTCATGGGTCATGGCATGTAG<br>GACRTTACGGGGAAGGAGTGGAGTA                                                                                                                                                                              |
| 5           | TTGTGACAGGCA<br>TGGGAGAT    | CAAACCTTCT<br>GTGGTTCCC  | TTGTGACAGGCATGGGAGATGTTGGCGGCAGSTGCAGRCCCCGT<br>AGGCAGCTCTGGCGGGGAAAAGGAGAGATTGRGCTTGAGAGGAT<br>GKTKGTGTTGAGTTGGAAACATTTTCTGGYTTTCAGTGCACAGCTGG<br>CCAAGGAAGAGCAGAGGAGGAAAAMGRGGCRGTGAAGAAGCG<br>CATCTTTGCAGCBGTGTCTGAGGGCTGCYRYYGAGRAGTGTGAG<br>GTTGTYGGTGGAGCTGCAGGAGCTTTGCAGGCRGCGCCATGATGA<br>GGATGTGCTGGTGAGTGTCTGAGCCTGGCAGAGGGTGCASGGCT<br>GGGGGCCCTGCTTGGCTTCTGGTGCCATTTTCCCCTCCCCTCACC<br>AACCSATGAGGCTGGAGTRTGAGGGGCCTTGAATTCTGGCTAGGG<br>ACTTTGAACTTGACTCCGAGGRGAATGGGAACCCACAGAAGGGTT<br>TG                                                                                                    |
| 6           | CTGGGAGTGGA<br>GATGTGGAG    | TCTTGTTACC<br>AGTGCATGC  | CTGGGAGTGGAGATGTGGAGCAGGGGCTTGGGCTGCGGCYGC<br>AGCAACCACACCCTCTGGGCTGGGAGGGCCAAGGGCAGCYRGGG<br>CCCTCCTGTAACTCCACCCATGGCCCTGCCTGCAGACTTCTCRTG<br>CACAARCTGAYGGCCTCCGACACGGGGAAGASCTGCCTGATGAAG<br>GCCTTGTTAAACATCAAMCCCAACACCAAGGRGATMGTGCGGAT<br>CCTGCTTGCCTTTGTCYGAAGASAAAYRACATYCTGGGCAGGTTTCA<br>CAAYGCCGAGTACACAGAGGARGCCTATRAAGGTATCC<br>TGCTGYAGAGGGGCGYGTGCAGACAGGAGTCTGAGGGTGGGG<br>TATGGGGCCACAGGGCCACTGCTGGCCAGGCCACTGGAGGCACT<br>GCTGCCATTGAGGAGCCCCAAGCATGTAGCATGGTACCAGGGATG<br>CTTCAGGCAACCCTCTCTTTCTTCTTTCATTYTGCAAATAATTTTGA<br>RCACTGGTCCATGCCAGGCATTGTTTTTGGCATGGGCATGCACTG<br>GTGAACAAGA |
| 7           | GTTCGGGGAGG<br>GTATGGAG     | TCTCTCCTTCC<br>TGTTTCCCC | GTTCGGGGAGGGTATGGAGGCCAGAGCGGGTGGGCAAGAGGCC<br>CTGTGCCGGCGCTGAGGCTCCCGCGCTCCCCGCCGCTCCGCA<br>GGGCAGACGGCGTGAACATCGCCATCGAGCGGCGGCRGGGGGA<br>CATYGCAGCCCTGCTCATCGCCGCCGCGCCGACGTCAACCGCA<br>CGCCAAGGGGGCCTTCTTCAACCCCAAGTACCAACACGAAGGCTT                                                                                                                                                                                                                                                                                                                                                                   |

|    |                          |                                 |                                                                                                                                                                                                                                                                                                                                                                                                                                                                                                                                                                                                                            |
|----|--------------------------|---------------------------------|----------------------------------------------------------------------------------------------------------------------------------------------------------------------------------------------------------------------------------------------------------------------------------------------------------------------------------------------------------------------------------------------------------------------------------------------------------------------------------------------------------------------------------------------------------------------------------------------------------------------------|
|    |                          |                                 | CTACTTCGGTGGGTGCCGCTCCCGCCCGGTGYGGAGTCTGGGAGG<br>AGGGAGGAGGRAGACGGGAGAGGAAGGGAGGGAAGGGGAAGGA<br>GGGAAGAAGGGAGGAGGGGGGAAGAAAGAGGGGAAGGAGGAAGG<br>AAGTGAGGAGGGAGAGGGAGGAAGGGAGGGGAAACAGGAAGG<br>AGAGA                                                                                                                                                                                                                                                                                                                                                                                                                        |
| 8  | AGAGGGCTAGG<br>GAACCTGAG | AGGCTGTGGTT<br>TGTGAATCC        | AGAGGGCTAGGGAACCTGAGGTGCSCATCCTGCTGAGATAGGATA<br>TGGGCYCCAGTCTGGGRCTTGGGGGACGCTGCTTCYRGCCCATG<br>ARAGAACCAAGCTTCAGYGCCTCATCCCCAGGTGAGAYGCCCC<br>TGGCCCTGGCRGCATGCACCAACCAGCCYAGATTGTGSAGCTGC<br>TGATGGAGCAYGAGCAGRYRGACATCACCTCRYGGGACTCACGA<br>GGCAACAACATCCTTYAYGCCCTGGTGACCGTGGCYGAGGACTTC<br>AAGACRCAGAATGACTTTGTGAAGYKRTGTRCGACATGATCCTA<br>CTGYKAGTGGCAACTGGGAGCTGGAGACCRCTYRCAACAAYGA<br>TGGSCTCAYRCCGCTGCAGCTGGCYRCCAARATGGGCAAGCCGA<br>GGYGGRGCCATGGGGCKTGGRGAGCAGGAGGTCRGGAGGTCAGG<br>AGGTACAGCTGCCACCCTCTCAGCCCCGGGGGCCYTACTGGGGAT<br>TCACAAACCACAGCCT                                                          |
| 9  | GGTATTCACAAC<br>CCCCAGTG | GCCTTTTCTGT<br>GCCTGACTC        | GGTATTCACAACCCCCAGTGAGATGGGCGGAACAGCAAGCTTTGT<br>GCGCATTCCACAGATAAAGACGGGGCCAGGGGCCATGGCGCCA<br>GGCGCAGAGGCAGGTCTCCACCCATTCTGGGCGRSTGTATCCCCT<br>GGGCCCAGCCAGCCTCTGGCTGGTCCAGCCCTGKGGCCTYAAGY<br>CCCTGTTCTGCAGTSATGGTTGTTCTCCTCCTGTCSAGATCCTG<br>AAGTACATCCTYRGTCGTGMGATCAAGGAGAAGYGGCTCYRGAG<br>YCTGTCCAGGAAGTTCACYGACTGGGYRTAYGGACCCGTGTCATC<br>CTCCCTTACGACCTCACCAACGTGGACACCAYCAYGGACAACCTC<br>AGTGCTGGAAATCACTGTCTACAACACCAAYATCGACRTGGGYCT<br>CCTGCACAGGCGGGGAAGGGCAGGGAGAAGAGGGCTGGACCTCA<br>GGCCAGGGGCTGAGAGGACGCTGGGAAGACCCAGTGTGCCAGC<br>TCCATCCCTCGGCATCTGCATACCCACTCTGTTGCCCTCAGTGAGC<br>AGAGTCAGGCACAGAAAAGGC |
| 10 | TTCCAACCAGAC<br>CAGTCCAT | GAAGCGTGAA<br>GGACAACCTGG       | TTCCAACCAGACCAGTCCATCRGGCATAATGATGGGCCCCCTTCTG<br>CAGCACTGACTCAGAGCTCCCGCAGGCCTTTAGAAAACGGTCCCW<br>CCCTSTCTCCCTCATCTCCATGGTGACTGGTGGCATTCTACCCCTA<br>GAACYGGSATGAGATGYTGACCCTGGAGCCRCTGCACAYDC<br>TGCTGCATATRAAGTGAAGAAGTTTGCCAAGCATGTTCTTCT<br>GTCCTTCTGCTTTTATTCTTCTACAACATCACCCGTACCTCTGTCT<br>CGTACTAYCGCCCCCGGGAGGAGGAGGTAYRTGGGCCCCCTTGSAG<br>GGGAAAATKGGGCYRTCAGAGCTGGAGGGGCTTGGAGCTGCC<br>CACGTGCAGGTGGGAAAACCTGAGRCCAGAGAGACCAGGAGATT<br>GGGCGGGTCCSCCAGTGTCTCCTCACGCTCC                                                                                                                                          |
| 11 | TGTTTCACCTGG<br>GTTTTGGT | TGGATGAAGT<br>AGGTAGGATA<br>GGC | TGTTTCACCTGGGTTTTGGTCCCTCTAGAGTTGGTGCCAGCCCTGT<br>CCTCCTTGCTTCCRTACTGACCACCCCTCTTCTTCSCTGCAGGCC<br>ATCCRCACCCCTTSGCCCTGACGCACWAGWTGGGTGGCTGCAG<br>YYCCTAGGGAGGATSTTTKGTCTCATCTGGGCCRTGTRCATCTCTG<br>TGAAAGAGGTAAGTGGGCCASCYGGCCCTTYCAGACYRCCCYGY<br>GAGGCAGGCAGGTGACAGCCTCYATCCCTCTCTGYTCTGCCATTA<br>CTGCTGGGGGGYTCTGGGGAGGCGTTTCCCTTCCYAAGCCTTACCTT<br>YCTGAGTTATAACATGGGAAAAAATGKATAAGSCTGGCCTATCCT<br>ACCTACTTCATCCA                                                                                                                                                                                                    |
| 12 | CTTTGTGCATTC<br>AACCTCA  | ATGGGCATTTA<br>CGTGTCTCC        | CTTTGTGCATTC AACCTCACTGAGTCTTGGTCTGGGGAAGCACC<br>CTCTGCTCAGTCCCCYGCTGAGGGCCATGAAGAGGGTGCAGTGT<br>TTCTTTYCTTCTGGCCTYMGGGCATTGCCATCTTCYTGCTGAGAC<br>CCTCGGATCTGCAGTCCATCCTCTCGGATGCCTGGTCCACTTTGT<br>CTTGTAAGTAGGTCTGGCCCTTGGTTATCGCCTCACAGGCWGGG<br>TTGACRTCTGTATGGTGGCTGCCGTGTCGCTCYTGAACAAATA<br>TCCTACTGTGCCAYGGTGTCCAGTCACTCTGCCATGGTTACACGC<br>CAGGGGTCTCTCTTCTCTCCTAGTAGGAGACACGTAATGCC<br>AT                                                                                                                                                                                                                         |
| 13 | GGTCTCTCAGC<br>ATCCGTCA  | GCATTTGGGAG<br>AAAGAGCAG        | GGTCTCTCAGCATCCGTCACCRGGGTGACTGTTYAGGGGRTTTAA<br>GGGAGGTTTTGGGGGATTTGCATATCTTTGCCCTSATGCTGAGAAGT<br>AAGTAAGGCCYGTGTCTCTCTGTCTCCTGAACAGTTTTATCCAAG<br>CTGTGCTTGTGATACTGTCTGWCTTCTGTACTGTTTGCCTACAAA<br>GAGTACCTCGCCTGCCTYRTGCTGGCCATGGCCCTGGGCTGGGCRA<br>ACATGCTCTACTRYACRCRGGGTTCCAGTCCATGDGCATGTACAG<br>CRTCATGATCCAGAAGGTGYGTTGAGAGCTGCRCYRGRYGGAGGG                                                                                                                                                                                                                                                                     |

|    |                          |                            |                                                                                                                                                                                                                                                                                                                                                                                                                                                                                                                                                                                                                                                       |
|----|--------------------------|----------------------------|-------------------------------------------------------------------------------------------------------------------------------------------------------------------------------------------------------------------------------------------------------------------------------------------------------------------------------------------------------------------------------------------------------------------------------------------------------------------------------------------------------------------------------------------------------------------------------------------------------------------------------------------------------|
|    |                          |                            | CCCTYRGAGGATGGCCATTTTTCAGATGGGGAAACTGAGATCTGG<br>AGAGGAAGAGGGGTTTACCAAGGGGCAGGTCACTGCTCTTTCTCC<br>CAAATGC                                                                                                                                                                                                                                                                                                                                                                                                                                                                                                                                             |
| 14 | AGTGTGAGCCT<br>TGGAGCAT  | CAAGTGCCCC<br>ACTGGTAGTT   | AGTGTGAGCCTTGGAGCATCAGGAGGATTTGGCTGGGGGAAGGG<br>AGAGTGGCCAAGTGAAGARACAGTTAGGGTGGGGGGTGGGAGA<br>GGGTGGGAAGCAGGAAGATCAGGGTGCYGTGMATATGTGCTTGC<br>ACCTTACACTTGAATTATRTTTATTTCCCTTATAGGTCATTTTGCRTG<br>AYGTTCTGAAGTTCTTGTGTTGTATATATCRTGTTTTGCTTGGATT<br>GGAGTAGGTAATTGATTTATAAATAATAGTAACTCCACATTTAT<br>AAACACTTYATACAGATGTCAAATGGCAAAGTGCATGGYGGCCT<br>YGGCAWCAATTAGACCAACTACCAGTGGGGCACT<br>TG                                                                                                                                                                                                                                                         |
| 15 | CCTGATGAGGCT<br>TTGAGAGG | GCTAAGGCCT<br>CCTCAAACCT   | CCTGATGAGGCTTTGAGAGGACCTGAAACTGGAGATGGGATTTAA<br>TGGCCAGAGAGAAGGAGGCAGCAGGCTTGTCAYGTAGGCAAATA<br>CACGCAAGCTTGTAGAGTAATTAYCAGGCAGAGAGCTGAGG<br>AGAGCACCTGTTATGYTCCCTTAGCCTTGGCCTCGCTGATYRAG<br>AAGTGTYYCAAAGACAACAAGGACTGCAGCTCCTAYGGCAGCTTC<br>AGYGAYRCAGTGTGGAACCTCTCAAGCTCAYCATAGGCCCTGGGT<br>GAYCYGARCATCCAACAGAACTCCARGTATCCWTTCTCTTTCTG<br>TTCTGCTCRTCACCTATGTCATCCTCACCTTTRTCTYCYCCTSA<br>CAYGCTCATTGCTCTGATGGGYGAGACTGTGGAGAAAGTCTCCAA<br>GGAGAGYGAACGCATCKGGRCCTGCAGGTGAGCCTAGGTGGAG<br>ACCCAGCRTGGGGGCCTCCACGGGACTCAGTTCAGCACGTGGTC<br>ATTGACTACTGTCAGCACCAAGTGGGTCTGAGGTGGGGCCTGAGAA<br>TCTGCACAAGCTCCTCAGTGTGTGGCCAGGTTTGGAGAGGCCTTA<br>GC |
| 16 | GACAGTGTGTGT<br>GCCCTTGT | CTGCAACCCC<br>ATAAGCAAAT   | GACAGTGTGTGTGCCCTTGTGTGTGCTTGTGAGTRTGGATGSCTA<br>CTCCKTAGACTTGCTTATGTTCYCCAGAGAGCCAGGACYATCTTGG<br>AGTTTGTAGRAAATGTTACCAGAATGGCTGAGGAGCAGATTCCGGA<br>TRGGAGAGCTGTGCRAGTGGCYRAGGATGATTTCYGACTGTGTT<br>TGCGGTAACAAAGGGAGAAGGGCCCTGGGGTGGTGGTCTTTGGG<br>GTGGGTAGAGAGGGGCAGGAYRGTGACAGGATGTTAGAGAAACA<br>GTGCCRCCACTTGCTAACCATACCACAGCTACTGTCTCTCCAGT<br>GGCCTCCTTGAAGAAGGAAATTTGCTTATGGGGTTGCGAG                                                                                                                                                                                                                                                         |
| 17 | GACAGACAGAA<br>GGGGAGCTG | CCTGCATGATG<br>TGTTTCTATGG | GACAGACAGAAAGGGGAGCTGTGTAGACACCAGGACRTCCCAAAC<br>GCAGGGYTATTTGTTAGTACTCAGTGAGGCACTGGTGAAATMGTA<br>AGAATSMITTATCACATTTGCAGGATCAATGAGGTGAAGTGGACTG<br>AATGGAAGACSCACGTCTCCTTCTTAAACGAAGASCCRGGKCCTG<br>TAAGACGAACAGGTACTGTCRYTGTGAGGTGACATGGTGTCTYGT<br>CCTGTCTCAGACCATGTAACCTTGRGCAGATCAAGTCTAAGGGTC<br>CTGACTTTCCCATCTGTCAAATGGGAGGGTTGAATGGAATGCT<br>TCTTAGGTCTCTCCAGCTCTGACTTTTAGAACCCYAGTTGGCACA<br>ACTTTTAAAATGGYGTAGCCCTAAGCCATAGAAACACATCATGCA<br>GG                                                                                                                                                                                            |
| 18 | GAGGTTGCAGT<br>GAGCTGAGA | GGGTGCACTCT<br>GCTTCTAGG   | GAGGTTGCAGTGAAGTGCAGATCACACCCTGCACTGCAGCCTGGG<br>TGACAARAGGGAAACTCCATCTCAAAAAAGAAAAAAGAAAAA<br>GAAAAAGAAACACACTATGCAGAGTGATATATTCTAAAATATR<br>TRTWTTTTTAAAAAGCARATTTCAACAAAATCCAAGATTCTTCCA<br>GGAACAACAGCAAAAYCACTCTCAAYGCATTTGAAGAAGTGCAG<br>GAATTCCKGAAACCTCGGTGTAGAAGYGGAACCCAGAGCKGRT<br>GTGCGCGTGCGYTGCTGGCGCTGCAGGCGGAGTCACYGACTCTS<br>TGCAGAGAGGCTTTGAGGRATGRTGGAGTCCGGCTCTGCTGGCCT<br>AGAAGCAGAGTGCACCC                                                                                                                                                                                                                                      |
